1      **Control-theoretic immune tradeoffs explain SARS-CoV-2 virulence and**  
2                               **transmission variation**

3                                    Anish A. Sarma<sup>1\*</sup>, Aartik Sarma, M.D.<sup>2</sup>, Marie Csete M.D., Ph.D.,

4                                    Peter P. Lee, M.D., John C. Doyle, Ph.D.

5   <sup>1</sup> Computation and Neural Systems, California Institute of Technology; Pasadena, CA 91105.

6   <sup>2</sup> Division of Pulmonology, Critical Care, Allergy, and Sleep Medicine, Department of Medicine,  
7   University of California-San Francisco; San Francisco, CA 94143.

8   <sup>3</sup> Department of Immuno-Oncology, City of Hope Comprehensive Cancer Center; Duarte, CA  
9   91010.

10  <sup>4</sup> Control and Dynamical Systems, California Institute of Technology; Pasadena, CA 91105.

11  \* Corresponding author. Email: [aasarma@caltech.edu](mailto:aasarma@caltech.edu)

12

13 **Abstract:** Dramatic variation in SARS-CoV-2 virulence and transmission between hosts has  
14 driven the COVID-19 pandemic. The complexity and dynamics of the immune response present  
15 a challenge to understanding variation in SARS-CoV-2 infections. To address this challenge, we  
16 apply control theory, a framework used to study complex feedback systems, to establish rigorous  
17 mathematical bounds on immune responses. Two mechanisms of SARS-CoV-2 biology are  
18 sufficient to create extreme variation between hosts: (1) a sparsely expressed host receptor and  
19 (2) potent, but not unique, suppression of interferon. The resulting model unifies disparate and  
20 unexplained features of the SARS-CoV-2 pandemic, predicts features of future viruses that  
21 threaten to cause pandemics, and identifies potential interventions.

22

### 23 **Main Text:**

24 Variations in virulence and transmission, shorthanded as the dual puzzles of  
25 asymptomatic cases and superspreaders, have made SARS-CoV-2 infection and spread difficult  
26 to predict and control (1–4). The relationship between pathogen virulence and transmission has  
27 been a subject of longstanding speculation and formal study (5–7), and continues to be debated  
28 in the context of variation in SARS-CoV-2 infection (3, 8–10). The complexity of the immune  
29 response has impeded a unified mechanistic understanding of virulence, transmission, and  
30 variation, relevant to SARS-CoV-2 and future emerging viruses (**Figure 1**). Here, we extend  
31 techniques from control theory, a mathematical framework that has been used to analyze  
32 complex feedback systems in both engineered and biological settings (11–14), to immune  
33 biology to analyze SARS-CoV-2 virulence and transmission.

34

### 35 **Results**

36 *A control-theoretic approach to immune dynamics*

37 We use control theory to uncover mechanisms that lead to variation in virulence and  
38 transmission. Informally, we compute the best-case immune response, consolidating unmodeled  
39 immune dynamics into a control function  $K$  (**Figure 2A**). The best-case immune response  
40 minimizes virulence and implicitly suppresses transmission. We implement mechanistic details  
41 as constraints on the set of realizable control functions, and in this way identify mechanisms  
42 (constraints) for which even a best-case  $K$  yields virulence and transmission variation. This best-  
43 case  $K$  bounds any immune system model that we could have used, allowing us to pose rigorous  
44 questions without a detailed model of immune dynamics. Formally, we consider the robust  
45 control problem:

$$46 \quad v[t + 1] = A_{\Delta}[t]v[t] + B_{\Delta}[t]u[t] + \delta[t]$$

$$47 \quad u[t] = K(v[1:t])$$

48  $v$  is a vector of viral loads,  $u$  is the immune action, and new virus enters the system as  $\delta$ .

49  $A_{\Delta}$  and  $B_{\Delta}$  are sets of time-varying matrices describing uncertain linearized dynamics. We  
50 leverage theorems guaranteeing that the best-case  $K$  always corresponds to a convex set, so that  
51 the best-case  $K$  computed from the set will be the best  $K$  over all realizable functions (15).

52

53 *The open-loop problem*

54 We first consider the open-loop dynamics of viral replication, or equivalently  $K = 0$ . We  
55 model viral infection in the individual host as a three-step process: cell entry, replication in the  
56 cell, and release of virus from the cell after an eclipse period  $T_e$  (16, 17).

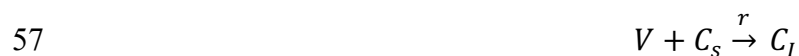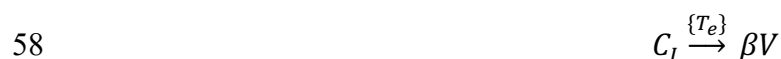

59 
$$V \xrightarrow{k} \emptyset$$

60 
$$C_I \xrightarrow{k_c} \emptyset$$

61 
$$C_S \xrightarrow{k_c} \emptyset$$

62 We derive  $A$  in terms of  $\alpha$ , the number of productively infected cells that result from a  
63 single infected cell, where  $(1-l/\phi)$  is the fraction of infected cells that constitutively turn over in  
64 a single eclipse period.

65 
$$A = \begin{bmatrix} 1 - k & k\alpha \\ I_{n-1} & 0 \end{bmatrix}$$

66 
$$\alpha = \frac{r\beta}{k\phi} [C_S]$$

67  $\alpha$  scales linearly with  $[C_S]$ . A small fraction of respiratory epithelial cells are susceptible  
68 to SARS-CoV-2 when compared to rhinovirus, respiratory syncytial virus, and influenza (18–  
69 22). A small susceptible cell fraction enables large *relative* variation consistent with reported  
70 single-cell data (20, 21) (**Figure 2B-C**).

71

## 72 *The closed-loop problem*

73 We next consider the effects of immune control with innate extracellular effectors.  
74 Higher  $\alpha$  requires stronger immune responses to achieve a comparable effect on viral load  
75 (**Figure 2D**). The immune response creates symptoms, which enable behavioral measures to  
76 avoid infection (23). We use a highly simplified model of avoidance and isolation, emphasizing  
77 the consequences of biological variation. We define transmission  $R_{CL}$ , where  $w(t)$  is a warning  
78 signal and  $\gamma(t) = \exp(-pw(t))$ . Initially, we take  $w(t)$  to be a scaled norm of the immune response,  
79 so that symptoms promote avoidance and isolation.

80 
$$R_{CL} = \alpha_r \omega \int_0^T v(t) \gamma(t) dt$$

81 We extend this simple behavioral model to address a virus with a long presymptomatic  
82 period followed by uniformly severe infection (**Figure 3A-B**). Advance warning and isolation  
83 measures can contain such a virus. However, fully asymptomatic cases make advance warning  
84 more difficult. Fully asymptomatic cases need not be as contagious as presymptomatic-severe  
85 cases to have this effect, and low rates of fully asymptomatic cases can be tolerated (**Figure 3C**).

86 Interferon-based control varies less with  $\alpha$  than extracellular responses, but interferon-  
87 suppressed control varies more. Early interventions with exogenous interferon can potentially  
88 reduce the eventual symptom burden in what would otherwise be severe cases (**Figure 3D-E**).

89 Taking these control layers together, we consider virulence and transmission as  $\alpha$  varies.  
90 Presymptomatic-severe high- $\alpha$  cases take a dominant role in spreading the pathogen, especially  
91 where they interact with other high- $\alpha$  individuals (**Figure 4**).

92

## 93 **Discussion**

### 94 *Other viruses*

95 HCoV-NL63 and SARS-CoV-1 also bind to ACE2. HCoV-NL63 infection is  
96 asymptomatic or cold-like (24), while SARS-CoV-1 infection is typically severe, with some  
97 reported asymptomatic cases (4, 25). Viral infection in these cases could be biologically variable  
98 with median effects that are too mild or too severe to be evident in clinical outcomes. SARS-  
99 CoV-1 exhibits variable transmission, consistent with this interpretation (26). HCoV-NL63's  
100 reduced virulence may result from a spike glycoprotein structure that decreases  $\alpha$  (27).

101

### 102 *Interferon signaling*

103           Clinical and experimental studies have shown that early exogenous interferon  
104 administration can reduce coronavirus infection severity (28–32). Our results suggest that  
105 presymptomatic interferon could be particularly beneficial in averting severe outcomes.  
106 Conversely, our results suggest a mechanism for harm from early immunosuppression in patients  
107 with SARS-CoV-2, consistent with clinical trial evidence (33). Because of the ubiquity of  
108 interferon suppression strategies in respiratory viruses, studies of control-guided interventions  
109 could facilitate responses to future emerging viruses.

110

111

- 112 1. C. Huang, Y. Wang, X. Li, L. Ren, J. Zhao, Y. Hu, L. Zhang, G. Fan, J. Xu, X. Gu, et al,  
113 Clinical features of patients infected with 2019 novel coronavirus in Wuhan, China. *The Lancet*.  
114 **395**, 497–506 (2020).
- 115 2. W. Guan, Z. Ni, Y. Hu, W. Liang, C. Ou, J. He, L. Liu, H. Shan, C. Lei, D. S. C. Hui, et  
116 al, Clinical Characteristics of Coronavirus Disease 2019 in China. *New England Journal of*  
117 *Medicine* (2020), doi:10.1056/nejmoa2002032.
- 118 3. W. J. Wiersinga, A. Rhodes, A. C. Cheng, S. J. Peacock, H. C. Prescott,  
119 Pathophysiology, Transmission, Diagnosis, and Treatment of Coronavirus Disease 2019  
120 (COVID-19). *JAMA*. **324**, 782 (2020).
- 121 4. E. Petersen, M. Koopmans, U. Go, D. H. Hamer, N. Petrosillo, F. Castelli, M. Storgaard,  
122 S. Al Khalili, L. Simonsen, Comparing SARS-CoV-2 with SARS-CoV and influenza pandemics.  
123 *The Lancet Infectious Diseases*. **20**, e238–e244 (2020).
- 124 5. R. M. Anderson, R. M. May, Coevolution of hosts and parasites. *Parasitology*. **85**, 411–  
125 426 (1982).
- 126 6. S. Alizon, A. Hurford, N. Mideo, M. Van Baalen, Virulence evolution and the trade-off  
127 hypothesis: history, current state of affairs and the future. *Journal of Evolutionary Biology*. **22**,  
128 245–259 (2008).
- 129 7. J. J. Bull, A. S. Luring, Theory and Empiricism in Virulence Evolution. *PLoS*  
130 *Pathogens*. **10**, e1004387 (2014).
- 131 8. M. A. Johansson, T. M. Quandelacy, S. Kada, P. V. Prasad, M. Steele, J. T. Brooks, R. B.  
132 Slayton, M. Biggerstaff, J. C. Butler, SARS-CoV-2 Transmission From People Without COVID-  
133 19 Symptoms. *JAMA Network Open*. **4**, e2035057 (2021).
- 134 9. O. Byambasuren, M. Cardona, K. Bell, J. Clark, M.-L. McLaws, P. Glasziou, Estimating  
135 the extent of asymptomatic COVID-19 and its potential for community transmission: Systematic  
136 review and meta-analysis. *Official Journal of the Association of Medical Microbiology and*  
137 *Infectious Disease Canada*. **5**, 223–234 (2020).
- 138 10. A. L. Rasmussen, S. V. Popescu, SARS-CoV-2 transmission without symptoms. *Science*.  
139 **371**, 1206–1207 (2021).
- 140 11. H. El-Samad, H. Kurata, J. C. Doyle, C. A. Gross, M. Khammash, Surviving heat shock:  
141 Control strategies for robustness and performance. *Proceedings of the National Academy of*  
142 *Sciences*. **102**, 2736–2741 (2005).
- 143 12. I. Lestas, G. Vinnicombe, J. Paulsson, Fundamental limits on the suppression of  
144 molecular fluctuations. *Nature*. **467**, 174–178 (2010).
- 145 13. F. A. Chandra, G. Buzi, J. C. Doyle, Glycolytic Oscillations and Limits on Robust  
146 Efficiency. *Science*. **333**, 187–192 (2011).
- 147 14. N. Li, J. Cruz, C. S. Chien, S. Sojoudi, B. Recht, D. Stone, M. Csete, D. Bahmiller, J. C.  
148 Doyle, Robust efficiency and actuator saturation explain healthy heart rate control and  
149 variability. *Proceedings of the National Academy of Sciences*. **111**, E3476–E3485 (2014).
- 150 15. Y.-S. Wang, Matni N., J. C. Doyle, A System-Level Approach to Controller Synthesis.  
151 *IEEE Transactions on Automatic Control*. **64**, 4079–4093 (2019).
- 152 16. P. Baccam, C. Beauchemin, C. A. Macken, F. G. Hayden, A. S. Perelson, Kinetics of  
153 Influenza A Virus Infection in Humans. *Journal of Virology*. **80**, 7590–7599 (2006).
- 154 17. M. A. Nowak, S. Bonhoeffer, A. M. Hill, R. Boehme, H. C. Thomas, H. McDade, Viral  
155 dynamics in hepatitis B virus infection. *Proceedings of the National Academy of Sciences*. **93**,  
156 4398–4402 (1996).

- 157 18. K. J. Travaglini, A. N. Nabhan, L. Penland, R. Sinha, A. Gillich, R. V. Sit, S. Chang, S.  
158 D. Conley, Y. Mori, J. Seita, et al, A molecular cell atlas of the human lung from single-cell  
159 RNA sequencing. *Nature*. **587**, 619–625 (2020).
- 160 19. A. Varki, Sialic acids in human health and disease. *Trends in Molecular Medicine*. **14**,  
161 351–360 (2008).
- 162 20. C. Muus, M. D. Luecken, G. Eraslan, L. Sikkema, A. Waghray, G. Heimberg, Y.  
163 Kobayashi, E. D. Vaishnav, A. Subramanian, et al, Single-cell meta-analysis of SARS-CoV-2  
164 entry genes across tissues and demographics. *Nature Medicine*. **27**, 546–559 (2021).
- 165 21. J. C. Smith, E. L. Sausville, V. Girish, M. L. Yuan, A. Vasudevan, K. M. John, J. M.  
166 Sheltzer, Cigarette Smoke Exposure and Inflammatory Signaling Increase the Expression of the  
167 SARS-CoV-2 Receptor ACE2 in the Respiratory Tract. *Developmental Cell*. **53**, 514-529.e3  
168 (2020).
- 169 22. S. Kasela, V. E. Ortega, M. Martorella, S. Garudadri, J. Nguyen, E. Ampleford, A.  
170 Pasanen, S. Nerella, K. L. Buschur, I. Z. Barjaktarevic, et al, *Genetic and non-genetic factors*  
171 *affecting the expression of COVID-19 relevant genes in the large airway epithelium* (Cold  
172 Spring Harbor Laboratory, 2020; <http://dx.doi.org/10.1101/2020.10.01.20202820>).
- 173 23. V. A. Curtis, Infection-avoidance behaviour in humans and other animals. *Trends in*  
174 *Immunology*. **35**, 457–464 (2014).
- 175 24. R. K. Dare, A. M. Fry, M. Chittaganpitch, P. Sawanpanyalert, S. J. Olsen, D. D. Erdman,  
176 Human Coronavirus Infections in Rural Thailand: A Comprehensive Study Using Real-Time  
177 Reverse-Transcription Polymerase Chain Reaction Assays. *The Journal of Infectious Diseases*.  
178 **196**, 1321–1328 (2007).
- 179 25. A. Wilder-Smith, M. D. Telesman, B. H. Heng, A. Earnest, A. E. Ling, Y. S. Leo,  
180 Asymptomatic SARS Coronavirus Infection among Healthcare Workers, Singapore. *Emerging*  
181 *Infectious Diseases*. **11**, 1142–1145 (2005).
- 182 26. J. O. Lloyd-Smith, S. J. Schreiber, P. E. Kopp, W. M. Getz, Superspreading and the  
183 effect of individual variation on disease emergence. *Nature*. **438**, 355–359 (2005).
- 184 27. A. B. Gussow, N. Auslander, G. Faure, Y. I. Wolf, F. Zhang, E. V. Koonin, Genomic  
185 determinants of pathogenicity in SARS-CoV-2 and other human coronaviruses. *Proceedings of*  
186 *the National Academy of Sciences*. **117**, 15193–15199 (2020).
- 187 28. E. Davoudi-Monfared, H. Rahmani, H. Khalili, M. Hajiabdolbaghi, M. Salehi, L.  
188 Abbasian, H. Kazemzadeh, M. S. Yekaninejad, A Randomized Clinical Trial of the Efficacy and  
189 Safety of Interferon  $\beta$ -1a in Treatment of Severe COVID-19. *Antimicrobial Agents and*  
190 *Chemotherapy*. **64** (2020), doi:10.1128/aac.01061-20.
- 191 29. P. D. Monk, R. J. Marsden, V. J. Tear, J. Brookes, T. N. Batten, M. Mankowski, F. J.  
192 Gabbay, D. E. Davies, S. T. Holgate, L.-P. Ho, et al, Safety and efficacy of inhaled nebulised  
193 interferon beta-1a (SNG001) for treatment of SARS-CoV-2 infection: a randomised, double-  
194 blind, placebo-controlled, phase 2 trial. *The Lancet Respiratory Medicine*. **9**, 196–206 (2021).
- 195 30. I. F.-N. Hung, K.-C. Lung, E. Y.-K. Tso, R. Liu, T. W.-H. Chung, M.-Y. Chu, Y.-Y. Ng,  
196 J. Lo, J. Chan, A. R. Tam, et al, Triple combination of interferon beta-1b, lopinavir-ritonavir,  
197 and ribavirin in the treatment of patients admitted to hospital with COVID-19: an open-label,  
198 randomised, phase 2 trial. *The Lancet* (2020), doi:10.1016/s0140-6736(20)31042-4.
- 199 31. R. Channappanavar, A. R. Fehr, R. Vijay, M. Mack, J. Zhao, D. K. Meyerholz, S.  
200 Perlman, Dysregulated Type I Interferon and Inflammatory Monocyte-Macrophage Responses  
201 Cause Lethal Pneumonia in SARS-CoV-Infected Mice. *Cell Host and Microbe*. **19**, 181–193  
202 (2016).



203 32. R. Channappanavar, A. R. Fehr, J. Zheng, C. Wohlford-Lenane, J. E. Abrahante, M.  
204 Mack, R. Sompallae, Jr. McCray Paul B., D. K. Meyerholz, S. Perlman, IFN-I response timing  
205 relative to virus replication determines MERS coronavirus infection outcomes. *Journal of*  
206 *Clinical Investigation*. **129**, 3625–3639 (2019).

207 33. Dexamethasone in Hospitalized Patients with Covid-19. *New England Journal of*  
208 *Medicine*. **384**, 693–704 (2021).

209

210

211

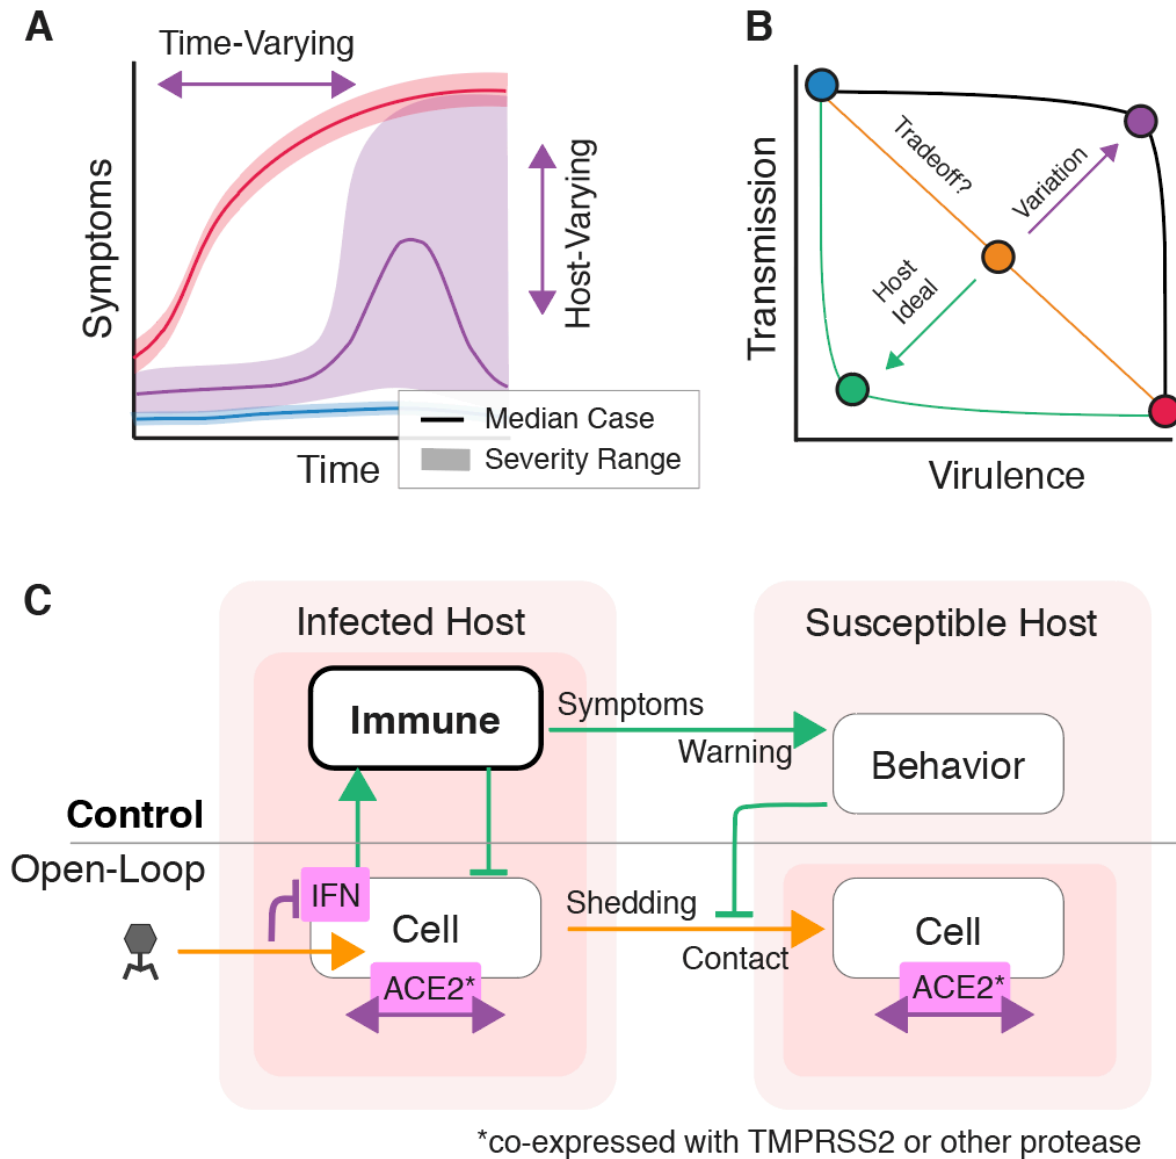

212

213 **Fig. 1. A control theory framework to analyze virulence and transmission.**

214 (A) Schematic time-series representations of symptoms for three viruses. The red and blue cases

215 have relatively low variation across hosts and across time. The purple case, schematically like

216 SARS-CoV-2, varies across hosts and across time, suggesting variation in host immune

217 responses.

218 (B) An apparent tradeoff between virulence and transmission can result from host immune  
219 responses. However, this tradeoff depends on host control mechanisms, and can be made more  
220 favorable to the host population or more favorable to the virus.

221 (C) A block diagram shows the relationships between virulence and transmission control in two  
222 hosts, one infected with SARS-CoV-2 and one susceptible. The dynamics without control are  
223 shown in the lower half of the diagram, and the control responses in the upper half. Immune  
224 responses suppress shedding, create symptoms, and allow behavioral responses.

225

226

227

228

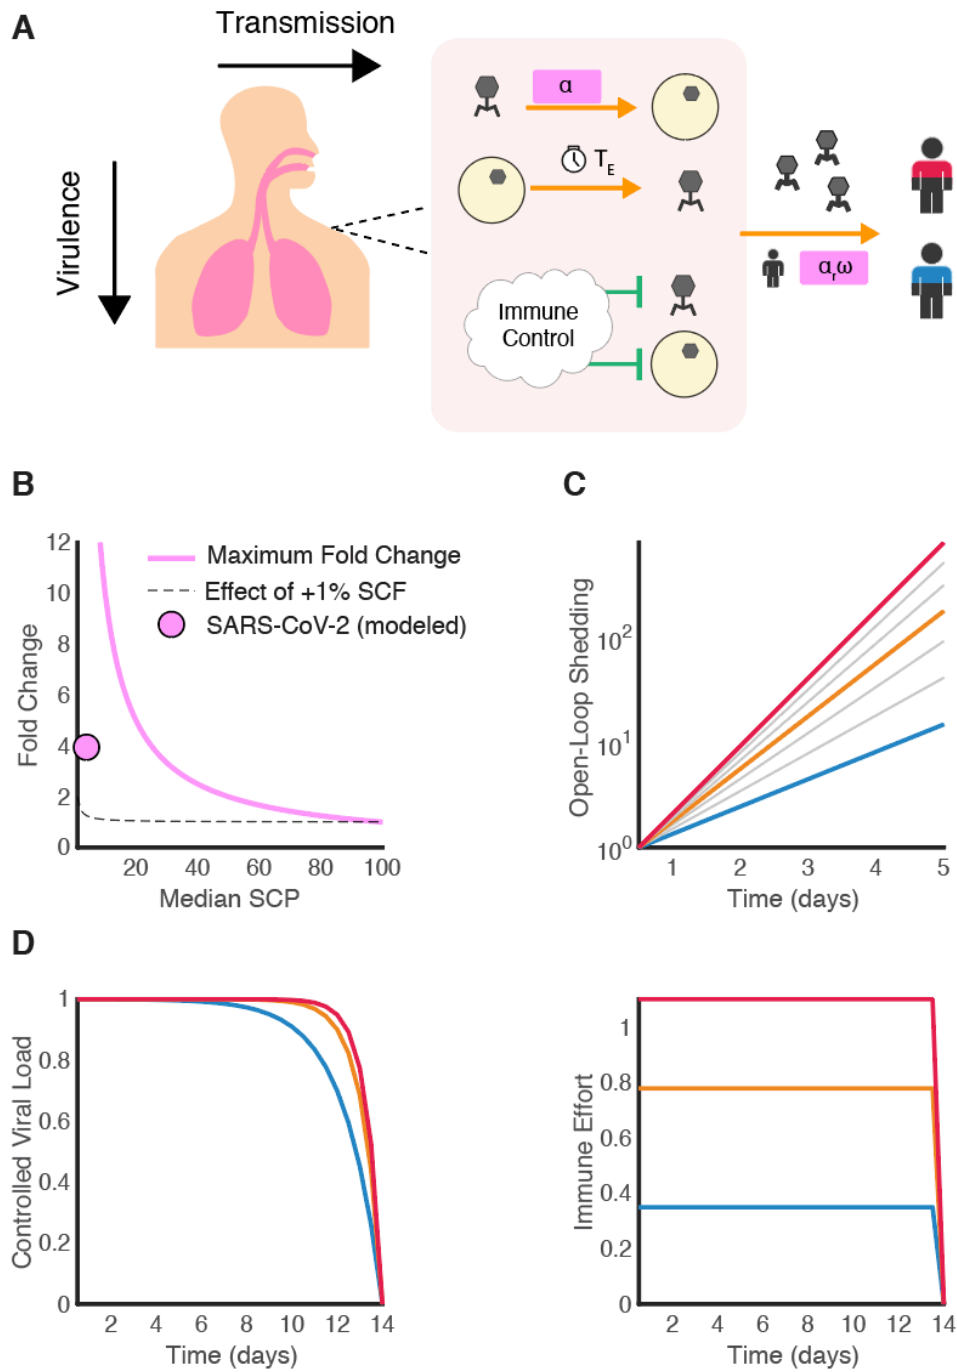

229

230 **Fig. 2. Host dynamics shape virulence and transmission.**

231

- 232 (A) Within each host, well-characterized kinetics govern viral replication. Viruses enter cells,  
233 replicate, exit after a delay, and degrade in the extracellular space. These kinetics are coupled to  
234 immune responses, for which we compute best-case bounds with control theory.
- 235 (B) A low susceptible cell percentage (SCP) in the host enables variation. The maximum fold-  
236 change deviation from the median and the effect of a small fluctuation both grow as the median  
237 SCP approaches 0%.
- 238 (C) An open-loop model removes all control elements and considers the underlying dynamics.  
239 Open-loop variation in viral shedding varies dramatically on relevant time-scales, amplifying  
240 variations in SCP.
- 241 (D) Ideal extracellular immune control can create similar, low-variation viral load trajectories  
242 between hosts, but these similar trajectories require differing immune effort. The underlying  
243 open-loop dynamics directly shape virulence.

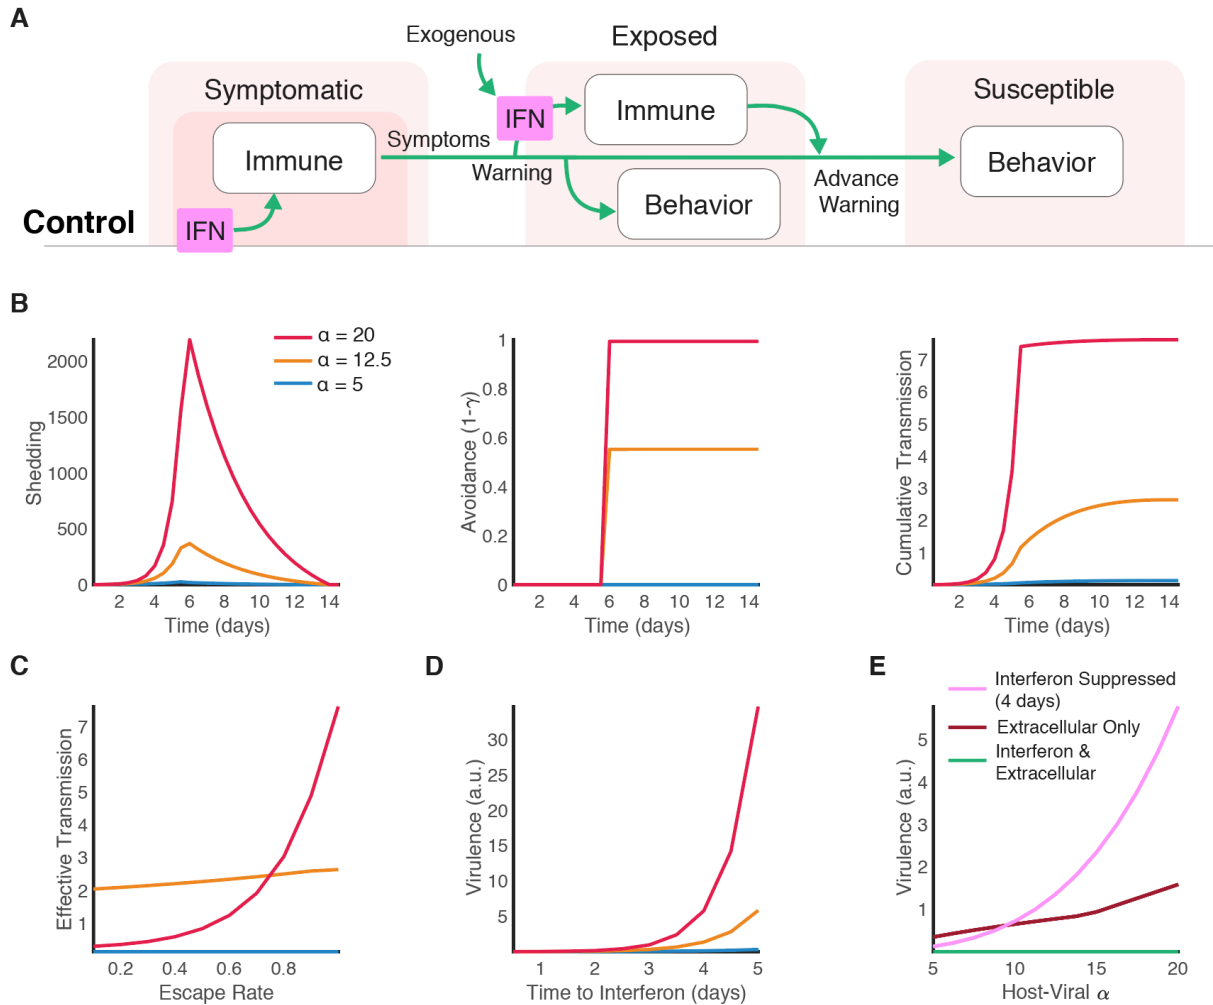

244

245 **Fig. 3. Layered control of virulence, transmission, and variation.**

246 (A) When all infected hosts are eventually symptomatic, advance warning allows isolation and  
 247 potentially treatment measures in pre-symptomatic individuals.

248 (B) Interferon-suppressed responses allow an extended period of viral replication and shedding  
 249 during which avoidance behaviors are not possible (without advance warning). Transmission can  
 250 be computed from the viral and immune trajectories.

251 (C) Advance warning can reduce the effective transmission rate of presymptomatic individuals,  
 252 but asymptomatic cases facilitate escape. As the rate of escape increases, the effective  
 253 transmission from presymptomatic-severe individuals increases sharply.

- 254 (D) Timing is a crucial determinant of interferon efficacy. Presymptomatic exogenous interferon  
255 administration can potentially reduce the eventual symptom burden in an individual who would  
256 otherwise experience severe disease.
- 257 (E) Extracellular immune responses vary more with  $\alpha$  than interferon-based immune responses,  
258 but interferon-suppressed responses vary most.

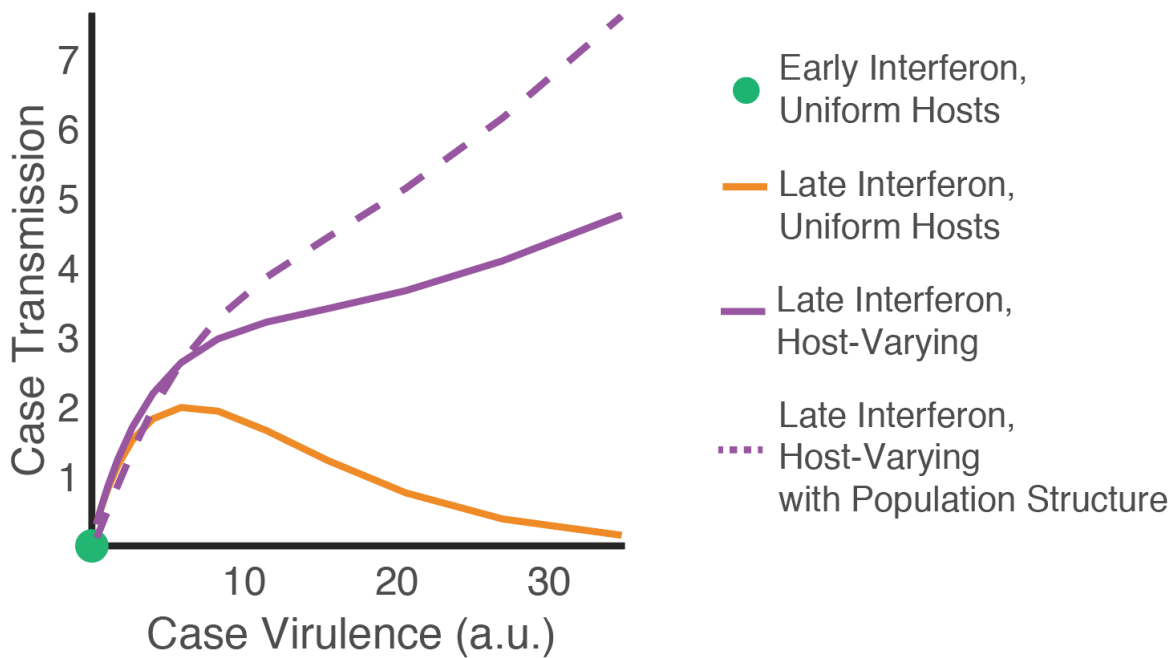

259

260

261 **Fig. 4. Virulence and transmission depend on host control strategies.**

262

263 The relationship between virulence and transmission depends on control conditions in individual

264 hosts. If immune control is ideal for the host, replication is quickly blocked by interferon and

265 neither serious symptoms nor substantial transmission occur. With interferon suppression,

266 transmission peaks at low virulence. With interferon suppression and host variation, however,

267 transmission is higher and peaks at higher virulence. This effect is amplified when high- $\alpha$

268 individuals interact, leading to both high presymptomatic shedding and high susceptibility.
